# Supplementary material for: A novel peptide relieves endothelial cell dysfunction in preeclampsia by regulating the PI3K/mTOR/HIF1α pathway
Source: PubMed Central journal article supplement — Int J Mol Med. 2020 Nov 19;47(1):276–88. doi: 10.3892/ijmm.2020.4793 (PMC7723499; doi:10.3892/ijmm.2020.4793), 2020-11-19
Supplement: Supplementary_Data.pdf [file Supplementary_Data.pdf]

Table SI. Primers used for reverse transcription-quantitative PCR in the present study.

| Gene        | Forward sequence (5'→3')  | Reverse sequence (5'→3') |
|-------------|---------------------------|--------------------------|
| Human-tPA   | AGCGAGCCAAGGTGTTTCAA      | CTTCCCAGCAAATCCTTCGGG    |
| Human-ET-1  | AGAGTGTGTCTACTTCTGCCA     | CTTCCAAGTCCATACGGAACAA   |
| Human-GAPDH | GGAGCGAGATCCCTCCAAAAT     | GGCTGTTGTCATACTTCTCATGG  |
| Rats-sFLT-1 | GAACCAATAAGACGGTTAGCACA   | GAAAGCCGTTTGGCACATC      |
| Rats-tPA    | GGAATTTGATGACGACACTTATGAC | GCACACTGACTGGAATCTGACC   |
| Rats-ET-1   | TGTCAGACTGGCAGAGGACC      | AATCACTTGCTACCAGCGGATG   |
| Rats-GAPDH  | GAACGGGAAGCTCACTGG        | GCCTGCTTCACCACCTTCT      |

ET-1, endothelin-1; tPA, tissue plasminogen activator; sFLT-1, soluble fms-like tyrosine kinase 1.
